# Supplementary material
Source: PubMed Central journal article supplement (PMC8760724)
Supplement: 12981_2021_427_MOESM1_ESM.pdf [file 12981_2021_427_MOESM1_ESM.pdf]

# Outcomes of patients with HIV and COVID-19 co-infection: a systematic review and meta-analysis

## APPENDIX

---

### Supplementary Figures

|                                                                                                                     |    |
|---------------------------------------------------------------------------------------------------------------------|----|
| Figure 1. PRISMA flow.....                                                                                          | 2  |
| Figure 2. Proportion of HIV patients among COVID-19 patients according to location (Africa vs Outside Africa) ..... | 4  |
| Figure 3. Proportion of HIV patients among COVID-19 patients according to location (USA vs Outside USA) .....       | 5  |
| Figure 4. Proportion of HIV patients among COVID-19 patients according to type of study .....                       | 6  |
| Figure 5. Odd of presenting with severe COVID-19 according to country location (USA vs Outside USA) .....           | 7  |
| Figure 6. Odd of presenting with severe COVID-19 according to country location (Africa vs Outside Africa).....      | 7  |
| Figure 7. Mortality risk according to country location (USA vs Outside USA).....                                    | 8  |
| Figure 8. Mortality risk according to country location (Africa vs Outside Africa) .....                             | 9  |
| Figure 9. Funnel plot of studies included in the meta-analysis of prevalence .....                                  | 9  |
| Figure 10. Funnel plot of studies included in the meta-analysis of In-hospital admission .....                      | 10 |
| Figure 11. Funnel plot of studies included in the meta-analysis of severity assessment .....                        | 10 |
| Figure 12. Funnel plot of studies included in the meta-analysis of mortality.....                                   | 11 |
| Figure 13. sensitivity analysis of studies included in prevalence assessment meta-analysis .....                    | 11 |
| Figure 14. sensitivity analysis of studies included in in-hospital admission risk meta-analysis.....                | 12 |
| Figure 15. sensitivity analysis of studies included in Severity assessment meta-analysis .....                      | 12 |
| Figure 16. sensitivity analysis of studies included in mortality risk assessment .....                              | 12 |

### Supplementary Tables

|                                           |   |
|-------------------------------------------|---|
| Table 1. Search strategy for PubMed ..... | 3 |
| Table 2. Search strategy for EMBASE ..... | 3 |
| Table 3. Search strategy for SCOPUS.....  | 3 |

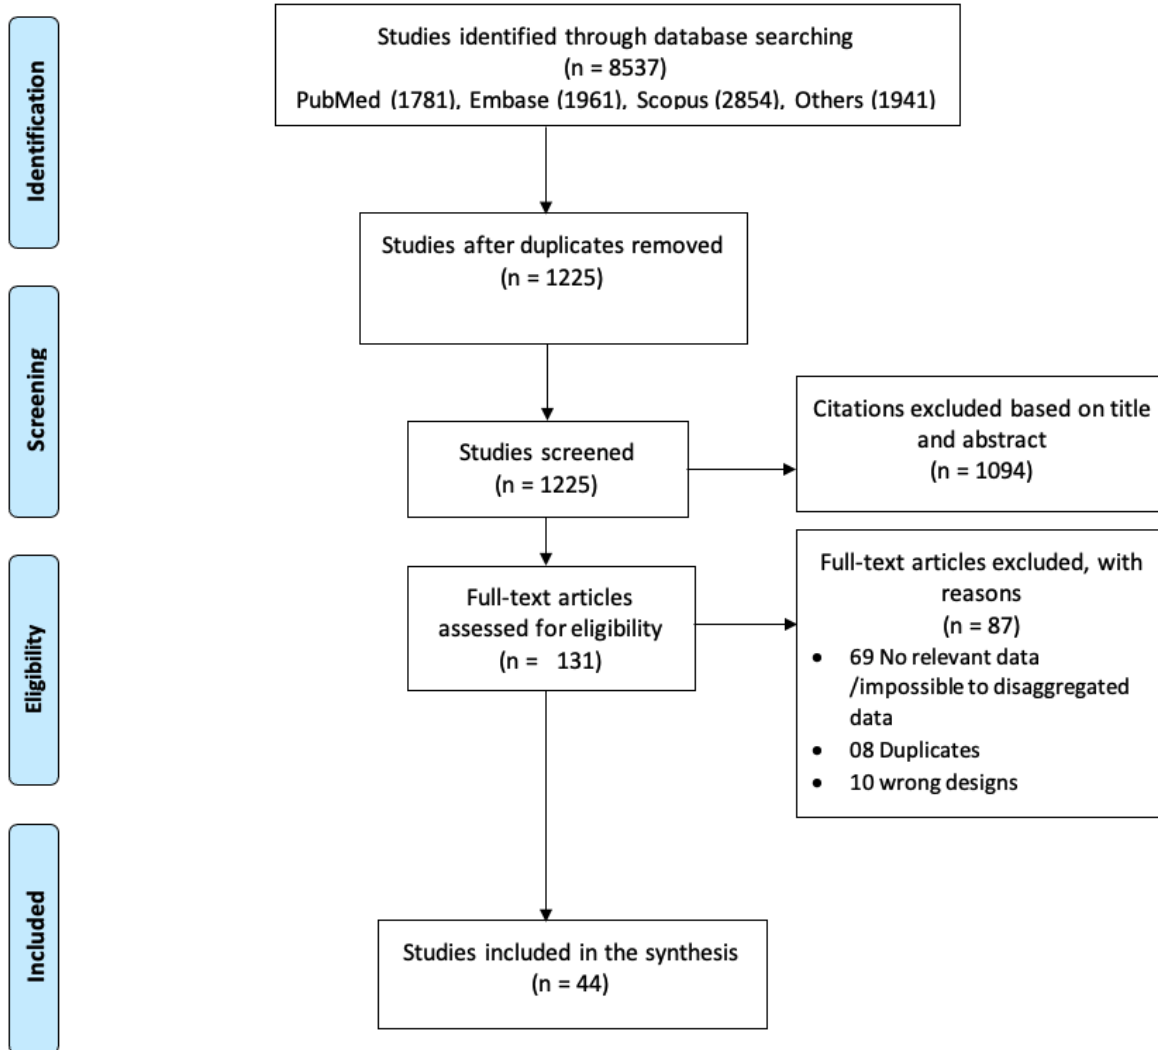

Figure 1. PRISMA flow

Table 1. Search strategy for PubMed

| Search                                      | Search terms                               |
|---------------------------------------------|--------------------------------------------|
| #1                                          | "HIV"[MeSH] OR "HIV"[tiab]                 |
| #2                                          | "COVID-19"[MeSH Terms] OR "COVID-19"[tiab] |
| #3                                          | #1 AND #2                                  |
| Date: 25 October 2021: 1781 citations found |                                            |

Table 2. Search strategy for EMBASE

| Search                                      | Search terms                                                                       |
|---------------------------------------------|------------------------------------------------------------------------------------|
| #1                                          | 'human immunodeficiency virus infection':ti,ab,kw OR hiv:ti,ab,kw                  |
| #2                                          | 'coronavirus disease 2019':ti,ab,kw OR 'covid 19':ti,ab,kw OR 'sars cov2':ti,ab,kw |
| #3                                          | #1 AND #2                                                                          |
| Date: 25 October 2021: 1961 citations found |                                                                                    |

Table 3. Search strategy for SCOPUS

| Search                                      | Search terms                                                                                                                         |
|---------------------------------------------|--------------------------------------------------------------------------------------------------------------------------------------|
| #1                                          | ( TITLE-ABS-KEY-AUTH ( hiv ) OR TITLE-ABS-KEY ( 'human AND immunodeficiency AND virus AND infection' ) )                             |
| #2                                          | ( TITLE-ABS-KEY-AUTH ( 'coronavirus AND disease AND 2019' ) OR TITLE-ABS-KEY ( 'covid AND 19' ) OR TITLE-ABS-KEY ( sars AND cov2 ) ) |
| #3                                          | #1 AND #2                                                                                                                            |
| Date: 25 October 2021: 2854 citations found |                                                                                                                                      |

Proportion of HIV patients among COVID-19 patients according to location (Africa vs Outside Africa)

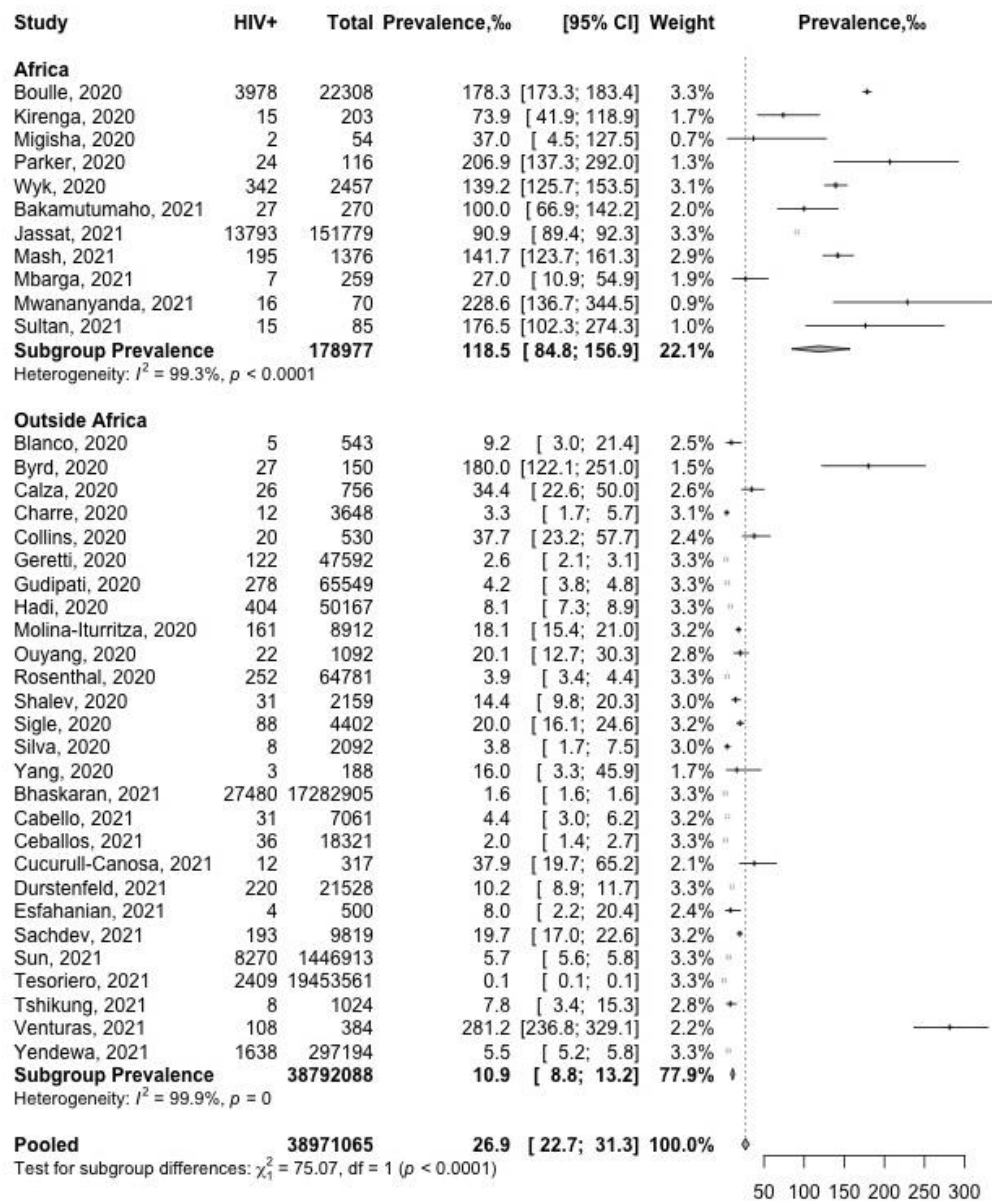

Figure 2. Proportion of HIV patients among COVID-19 patients according to location (Africa vs Outside Africa)

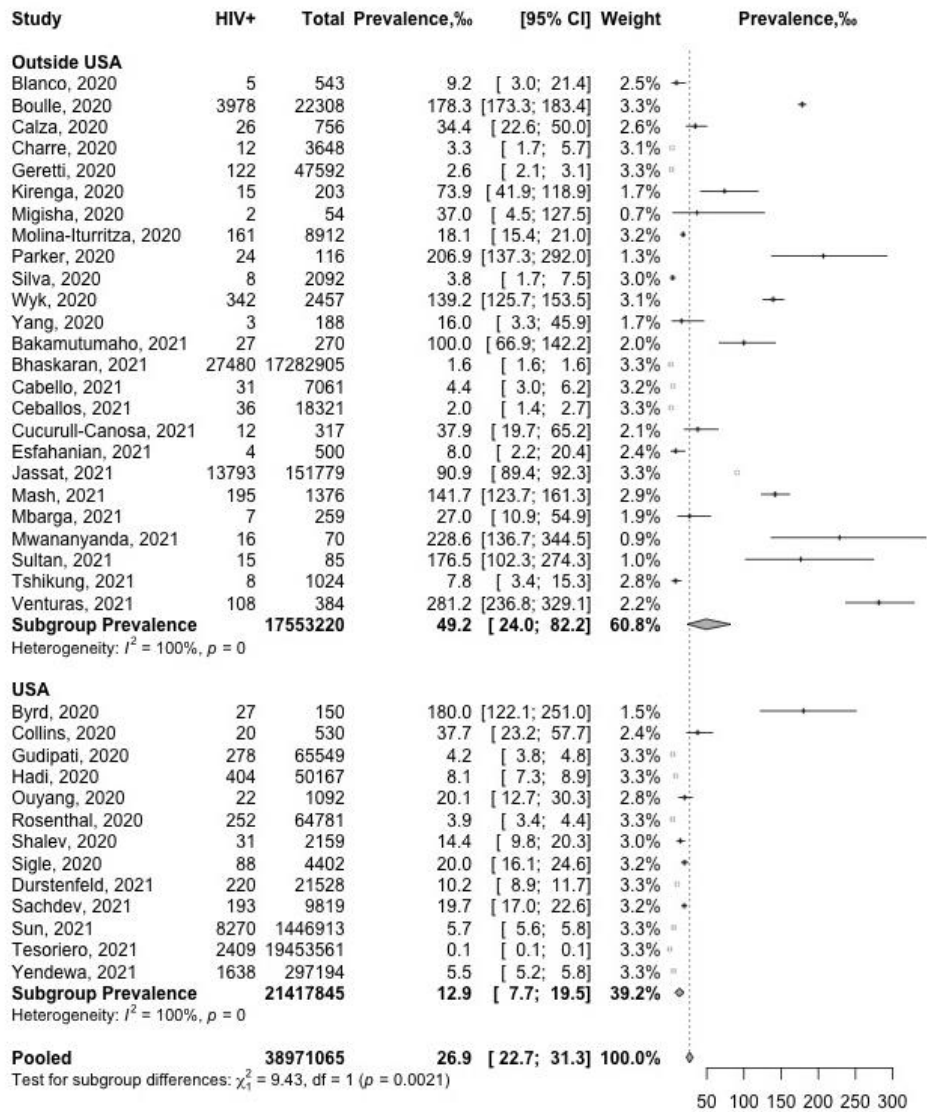

Figure 3. Proportion of HIV patients among COVID-19 patients according to location (USA vs Outside USA)

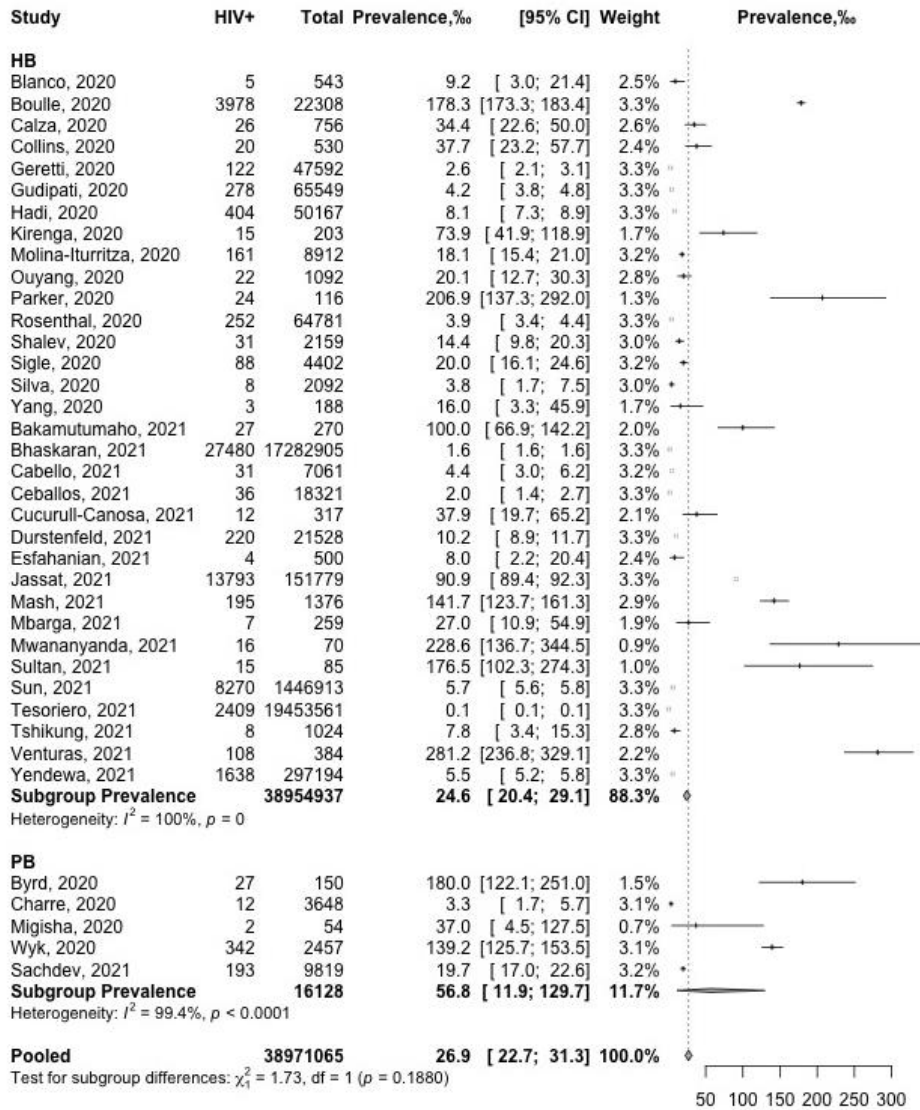

HB: hospital-based, PB: Population-based

Figure 4. Proportion of HIV patients among COVID-19 patients according to type of study



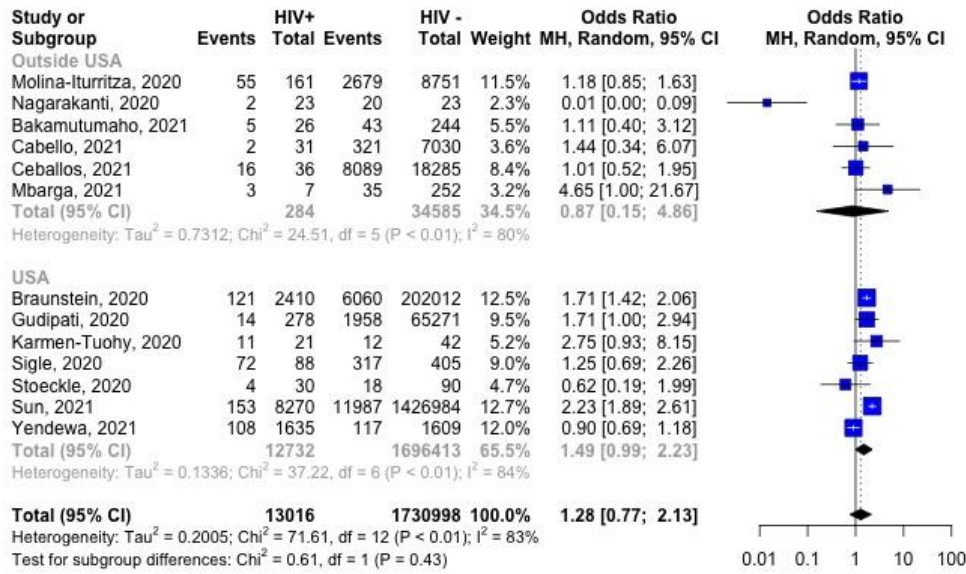

Figure 5. Odd of presenting with severe COVID-19 according to country location (USA vs Outside USA)

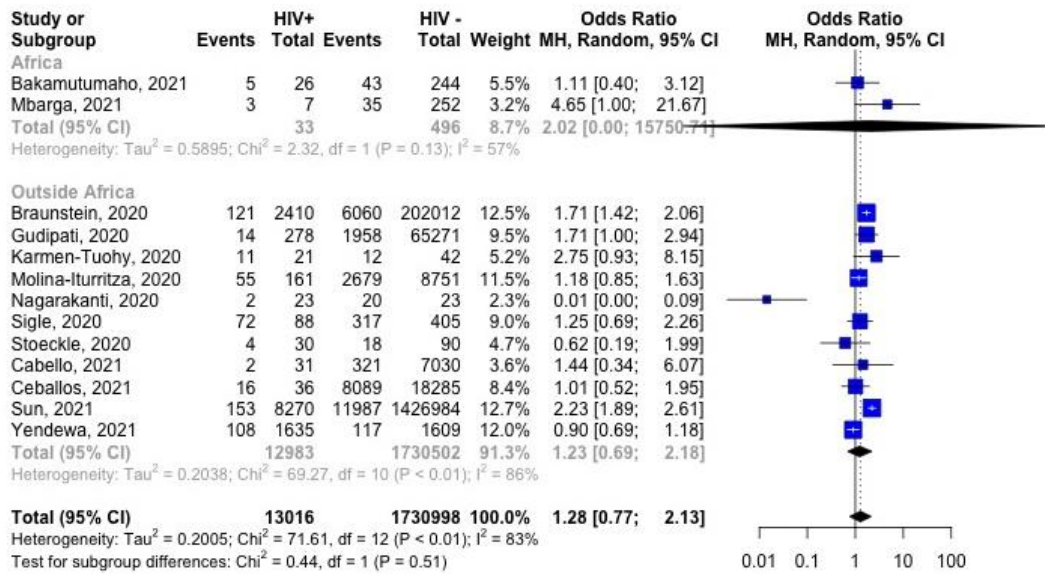

Figure 6. Odd of presenting with severe COVID-19 according to country location (Africa vs Outside Africa)

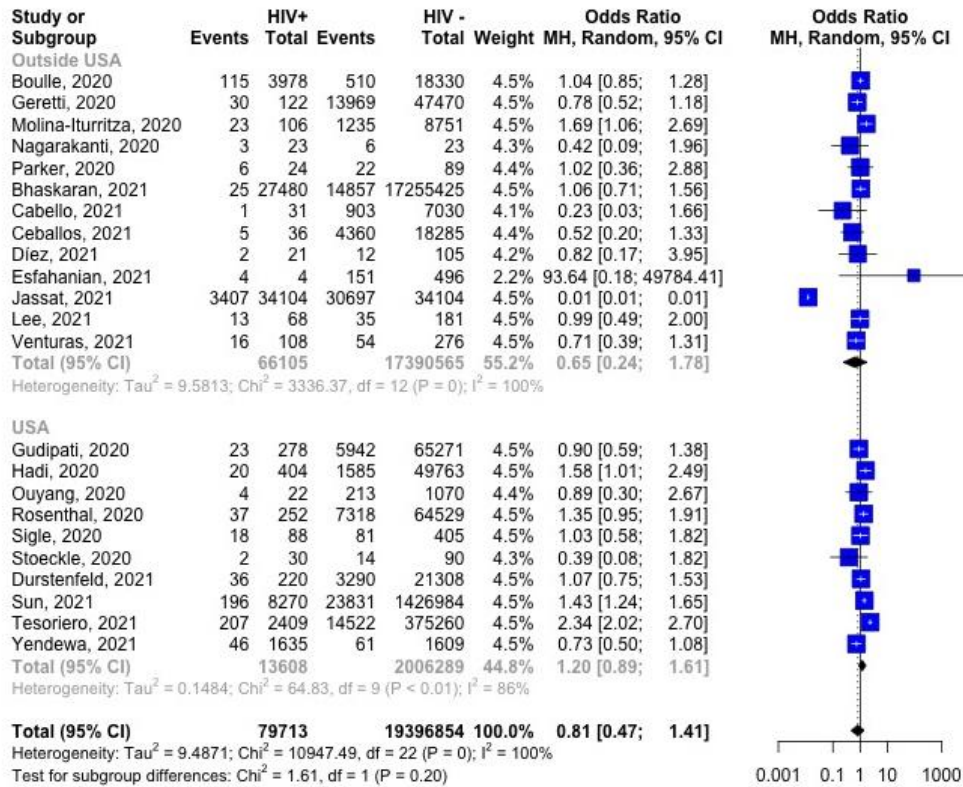

Figure 7. Mortality risk according to country location (USA vs Outside USA)



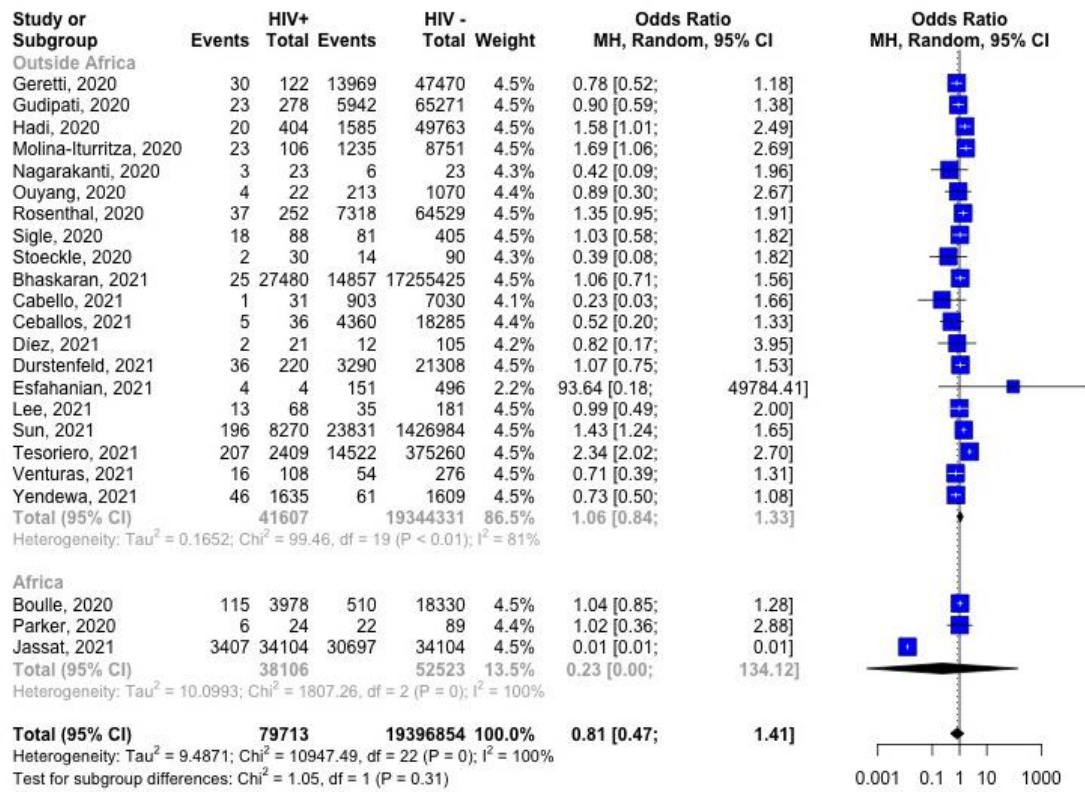

Figure 8. Mortality risk according to country location (Africa vs Outside Africa)

### Publication Bias

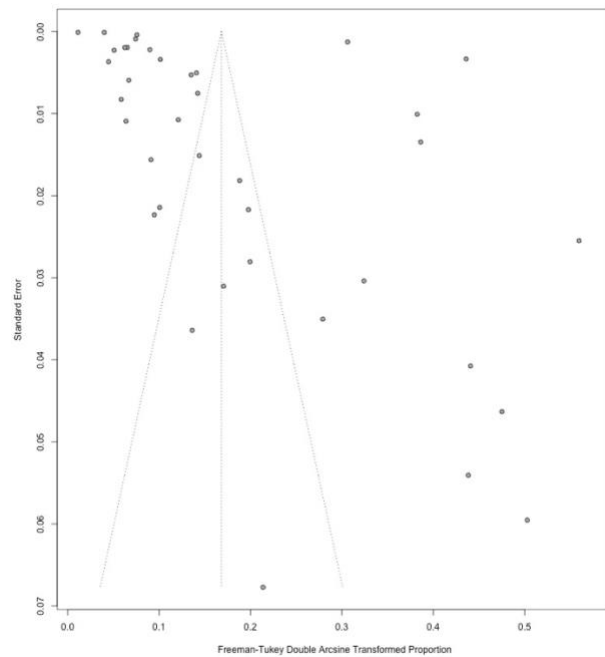

Egger's test p-value = 0.0115

Figure 9. Funnel plot of studies included in the meta-analysis of prevalence

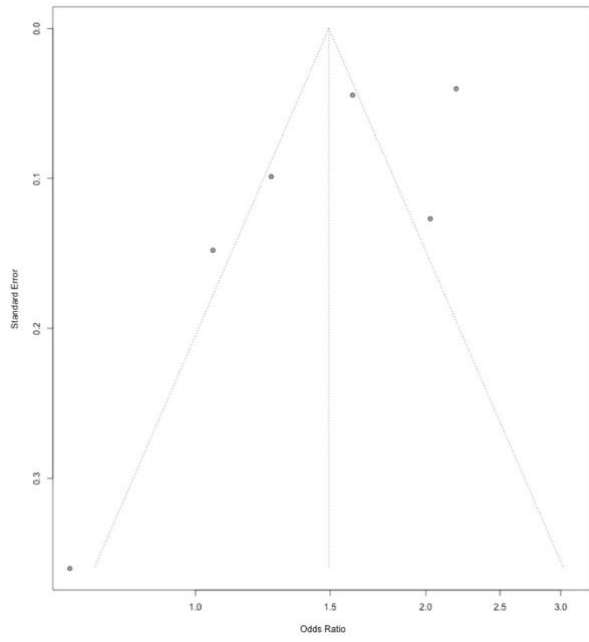

Egger's test p-value =0.1826

Figure 10. Funnel plot of studies included in the meta-analysis of In-hospital admission

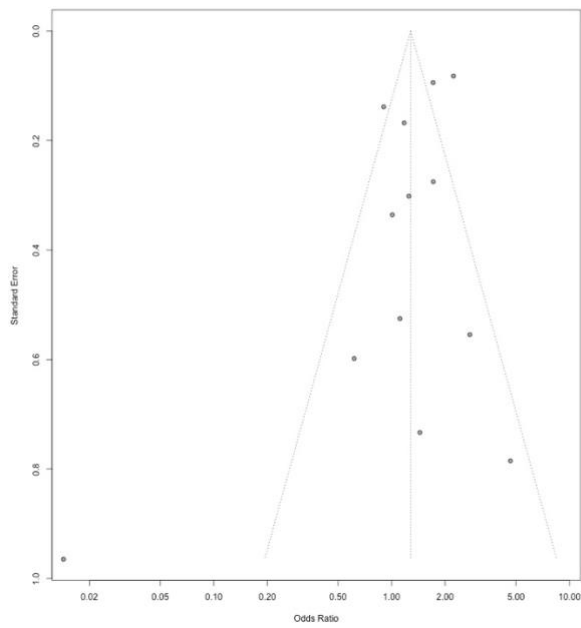

Egger's test p-value =0.1218

Figure 11. Funnel plot of studies included in the meta-analysis of severity assessment

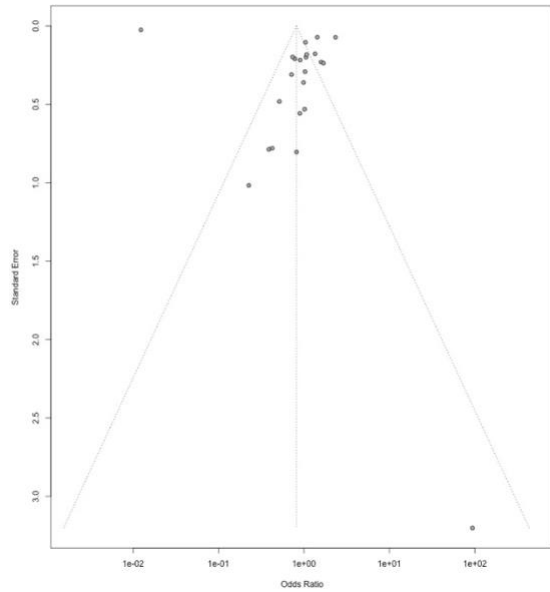

Egger test p-value = 0.0032

Figure 12. Funnel plot of studies included in the meta-analysis of mortality

### Sensitivity analysis

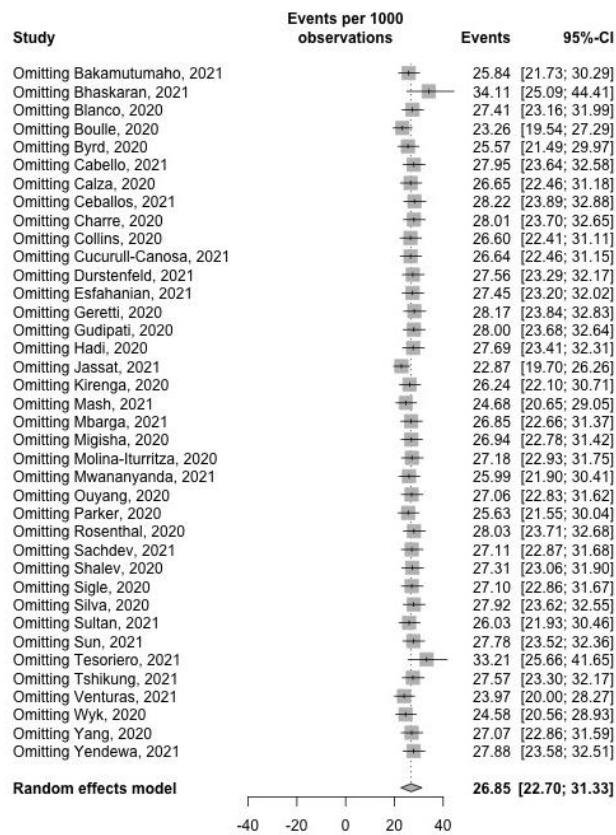

Figure 13. sensitivity analysis of studies included in prevalence assessment meta-analysis

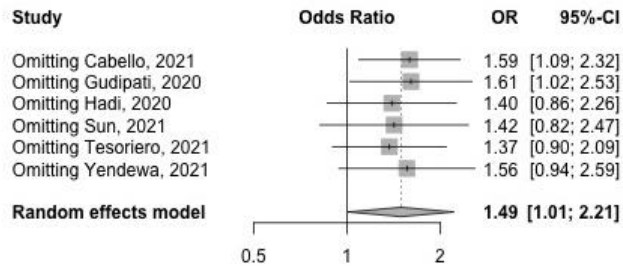

Figure 14. sensitivity analysis of studies included in in-hospital admission risk meta-analysis

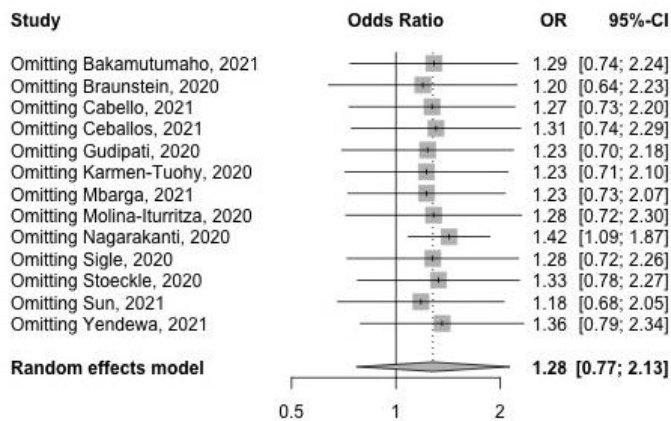

Figure 15. sensitivity analysis of studies included in Severity assessment meta-analysis

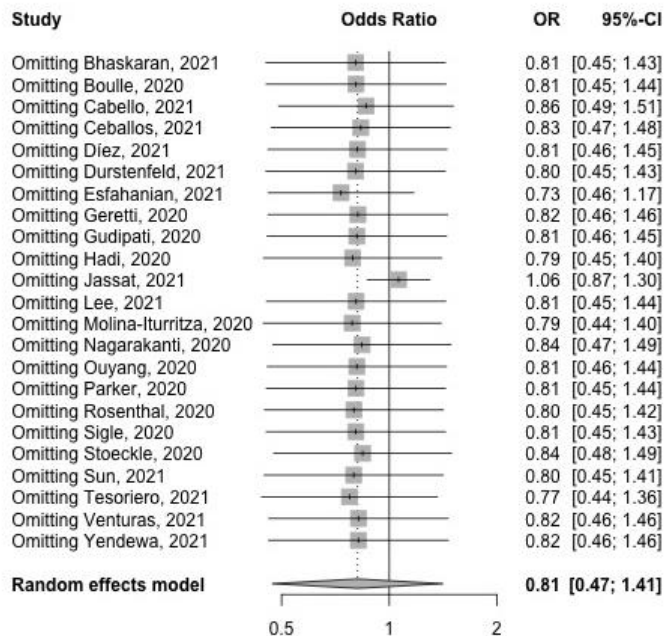

Figure 16. sensitivity analysis of studies included in mortality risk assessment
